# Supplementary material for: Bulk superhydrophobic materials: a facile and efficient approach to access superhydrophobicity by silane and urethane chemistries
Source: Royal Society of Chemistry journal article supplement (doi:10.1039/c4ta03127j), 2014-01-01
Supplement: c4ta03127j1.pdf [file c4ta03127j1.pdf]

**Supporting information**

**Bulk Superhydrophobic Materials; a Facile and Efficient Approach to Access Superhydrophobicity by Silane and Urethane Chemistry**

***K. S. Santhosh Kumar\*, Vijendra Kumar and C.P. Reghunadhan Nair***

Polymers and Special Chemicals Group, Vikram Sarabhai Space Centre, Thiruvananthapuram-695022 (India), Fax: 0471-2564203  
E-mail: santhoshkshankar@yahoo.com

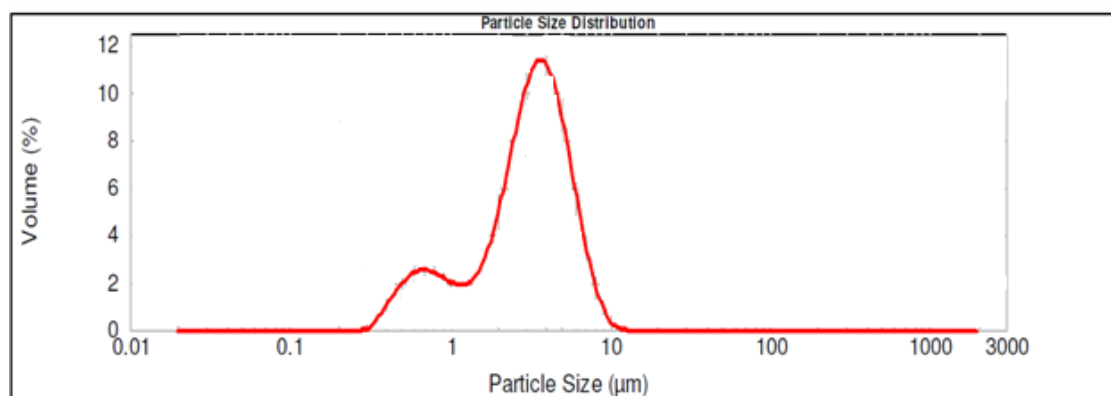

***SII*** Particle size distribution of unfunctionalised CaCO<sub>3</sub>microparticles

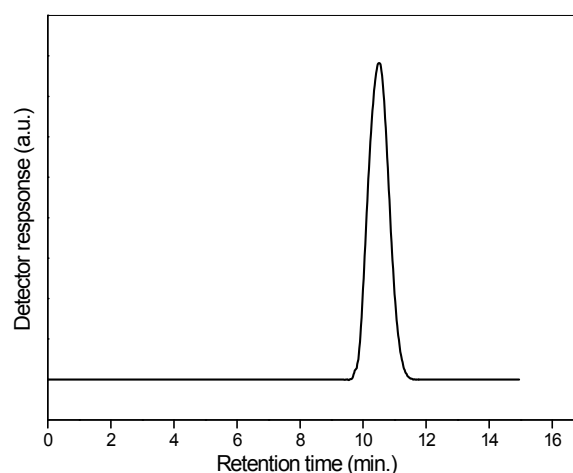

***SI2*** GPC profiles of siloxanepolymer units attached on to calcium carbonate surfaces

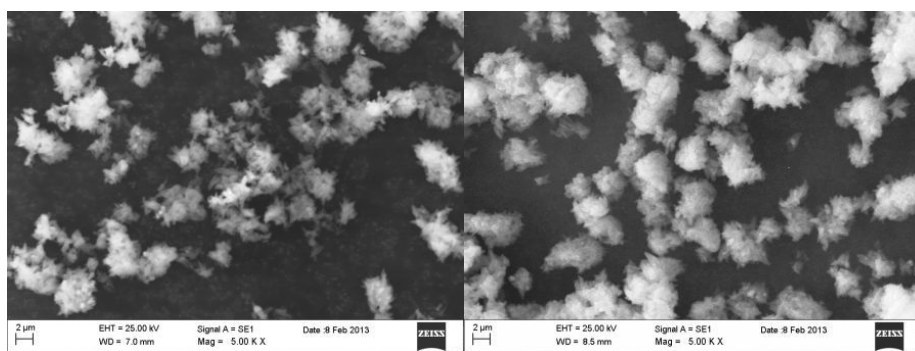

a)

b)

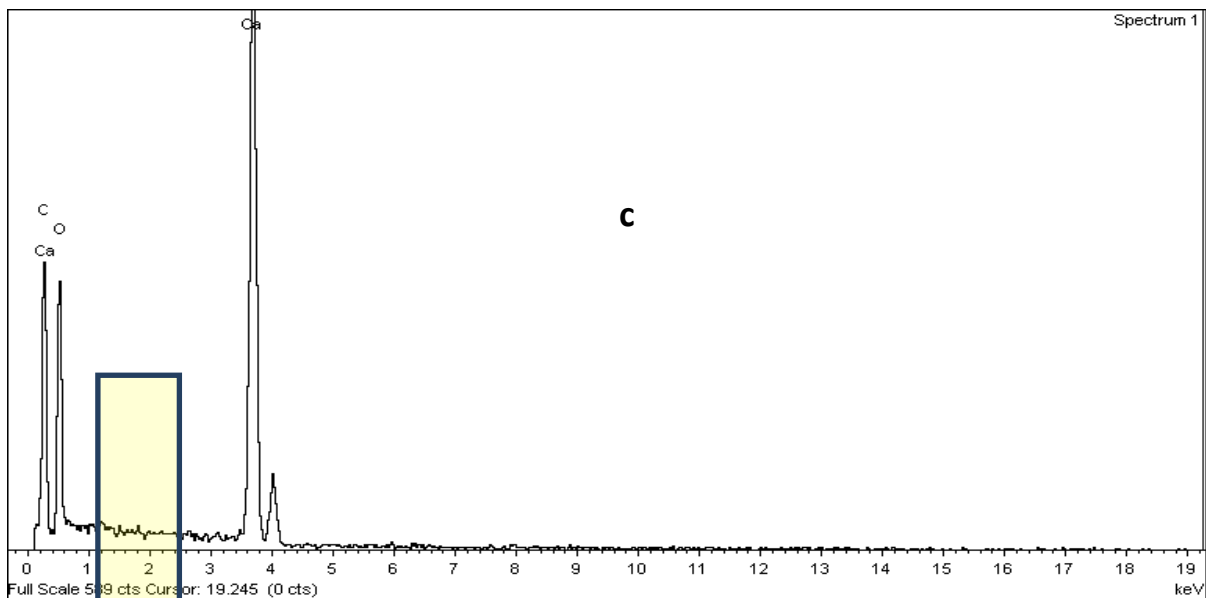

c

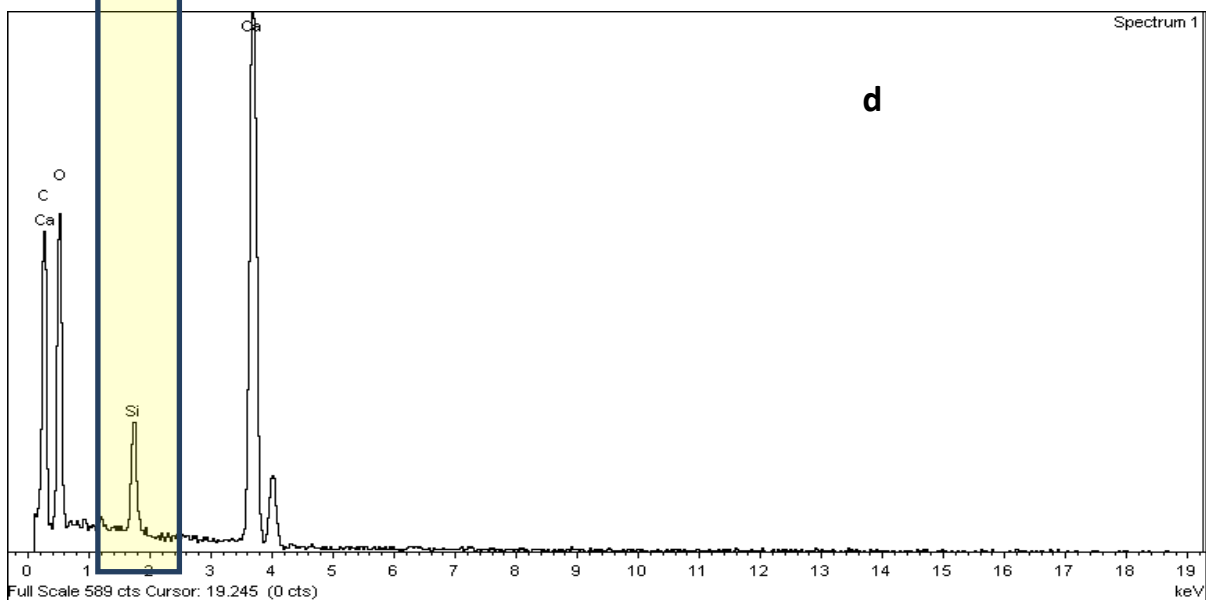

d

**SI3** a & b) SEM images of bare and functionalised calcium carbonate microparticles respectively c) EDX spectrum of bare microparticle showing no peak for silicon atom d) functionalised microparticles indicates presence of silicon.

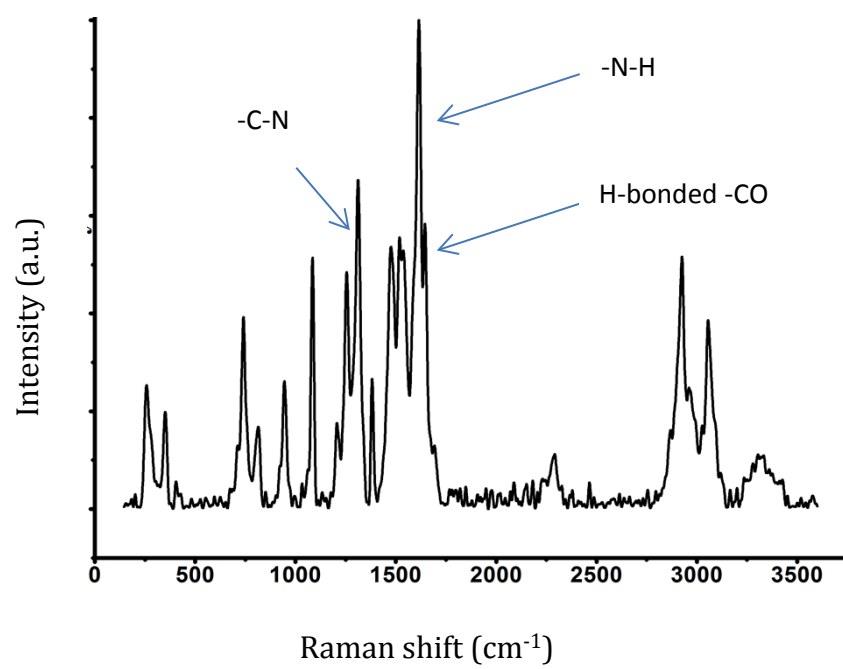

**SI4** Raman spectrum of superhydrophobic coating.

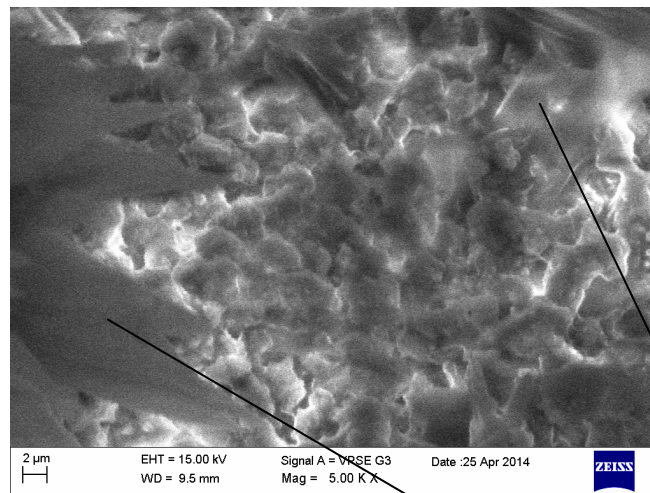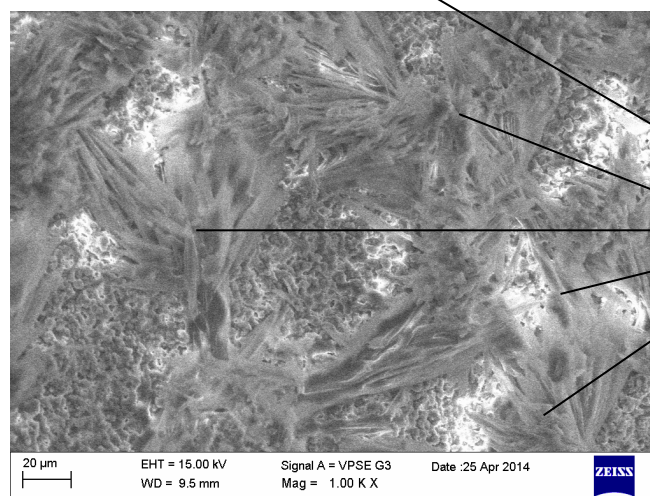

CaCO<sub>3</sub> particles in  
PDMS case  
(Presence of Si and Ca  
elements were  
confirmed by EDX)

**S15** SEM images of bottom surface of SH coating.
